# Supplementary material for: Scaling Up DNA Origami Lattice Assembly
Source: PubMed Central journal article supplement (PMC8252642; doi:10.1002/chem.202100784), 2021-05-04
Supplement: CHEM-27-8564-s001.pdf [file CHEM-27-8564-s001.pdf]

# Chemistry–A European Journal

Supporting Information

## **Scaling Up DNA Origami Lattice Assembly**

Yang Xin, Boxuan Shen, Mauri A. Kostianen, Guido Grundmeier, Mario Castro,  
Veikko Linko,\* and Adrian Keller\*

## Author Contributions

Y.X. Conceptualization:Supporting; Data curation:Equal; Formal analysis:Equal; Investigation:Equal; Methodology:Equal; Validation:Equal; Visualization:Equal; Writing – original draft:Supporting; Writing – review & editing:Equal

B.S. Conceptualization:Supporting; Data curation:Equal; Formal analysis:Equal; Investigation:Equal; Methodology:Equal; Validation:Equal; Visualization:Equal; Writing – original draft:Supporting; Writing – review & editing:Equal

M.K. Supervision:Supporting; Writing – review & editing:Equal

G.G. Supervision:Supporting; Writing – review & editing:Equal

M.C. Data curation:Equal; Formal analysis:Lead; Methodology:Equal; Validation:Equal; Visualization:Equal; Writing – review & editing:Equal

V.L. Conceptualization:Lead; Methodology:Equal; Supervision:Supporting; Writing – original draft:Supporting; Writing – review & editing:Equal

A.K. Conceptualization:Lead; Data curation:Equal; Formal analysis:Equal; Methodology:Equal; Supervision:Lead; Validation:Equal; Visualization:Equal; Writing – original draft:Lead; Writing – review & editing:Equal

## Sequences and locations of the biotin-modified staple strands

**Table S1.** Sequences of the biotin-modified staple strands. The biotin modification is indicated by Bt, the T4 spacers are highlighted in bold face. The staple ID corresponds to Rothemund's original notation.

| staple ID | sequence (5' → 3')                                   |
|-----------|------------------------------------------------------|
| t6s5g     | Bt- <b>TTTT</b> CAGAGCCAGGAGGTTGAGGCAGGTAACAGTGCCCCG |
| t6s7f     | ATTAAGGCCGTAATCAGTAGCGAGCCACCCTTTT-Bt                |

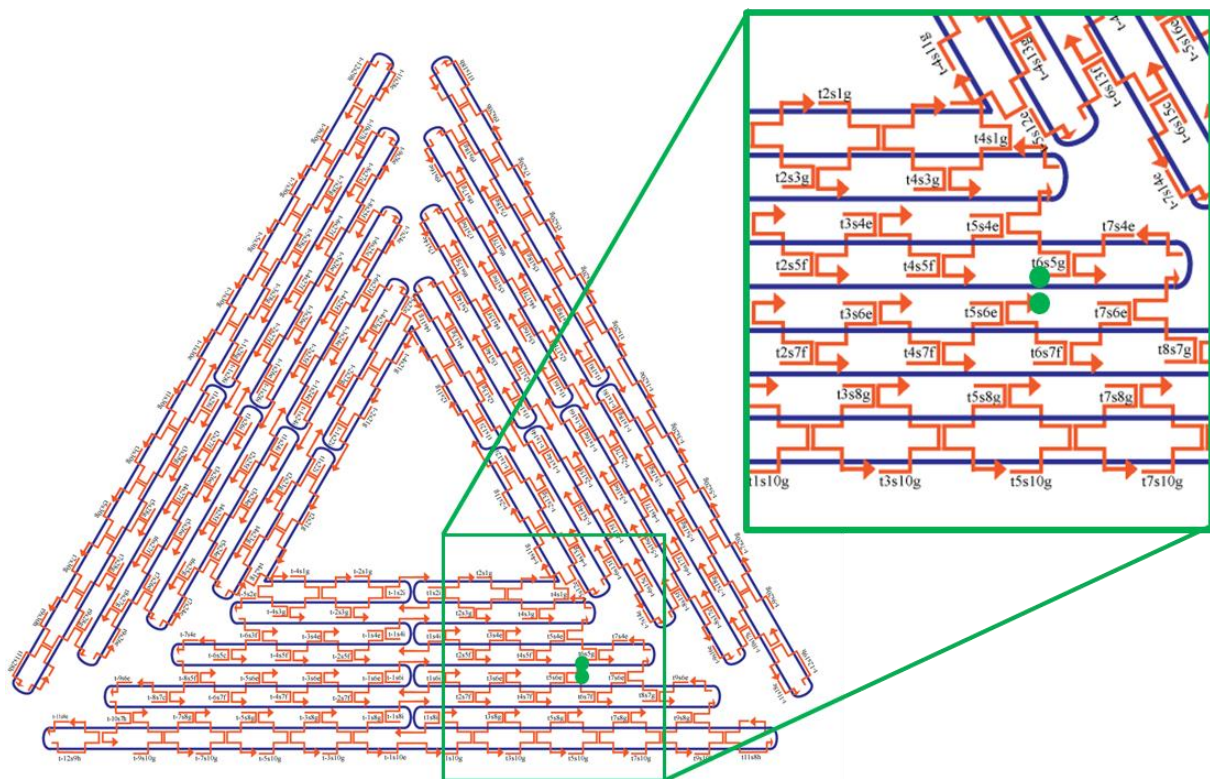

**Figure S1.** Map showing the staple (red) and scaffold (blue) arrangement in the DNA origami triangle. The locations of the biotin modifications used for QD binding are indicated by the green circles.

Definition of the topological parameters  $\rho_6$  and  $\mu_2$

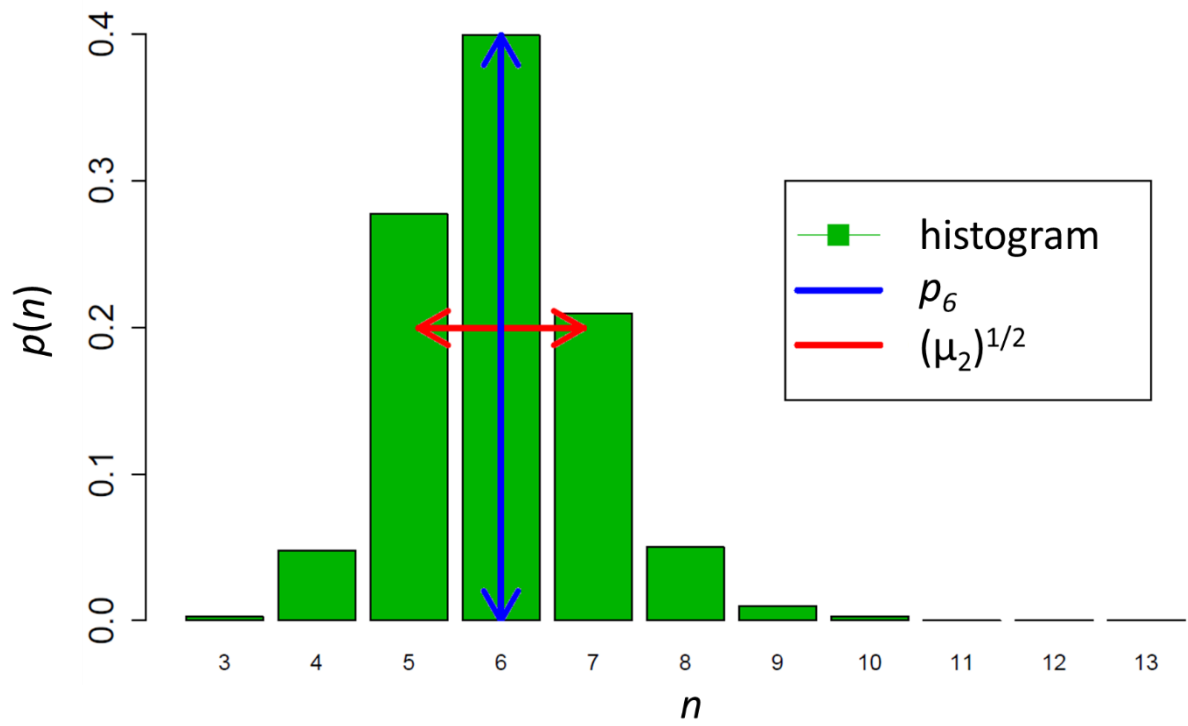

Figure S2. Example distribution of nearest neighbors for a DNA origami lattice. The topological parameters  $\mu_2$  and  $\rho_6$  are indicated by the arrows.



## Fluorescence microscopy investigation

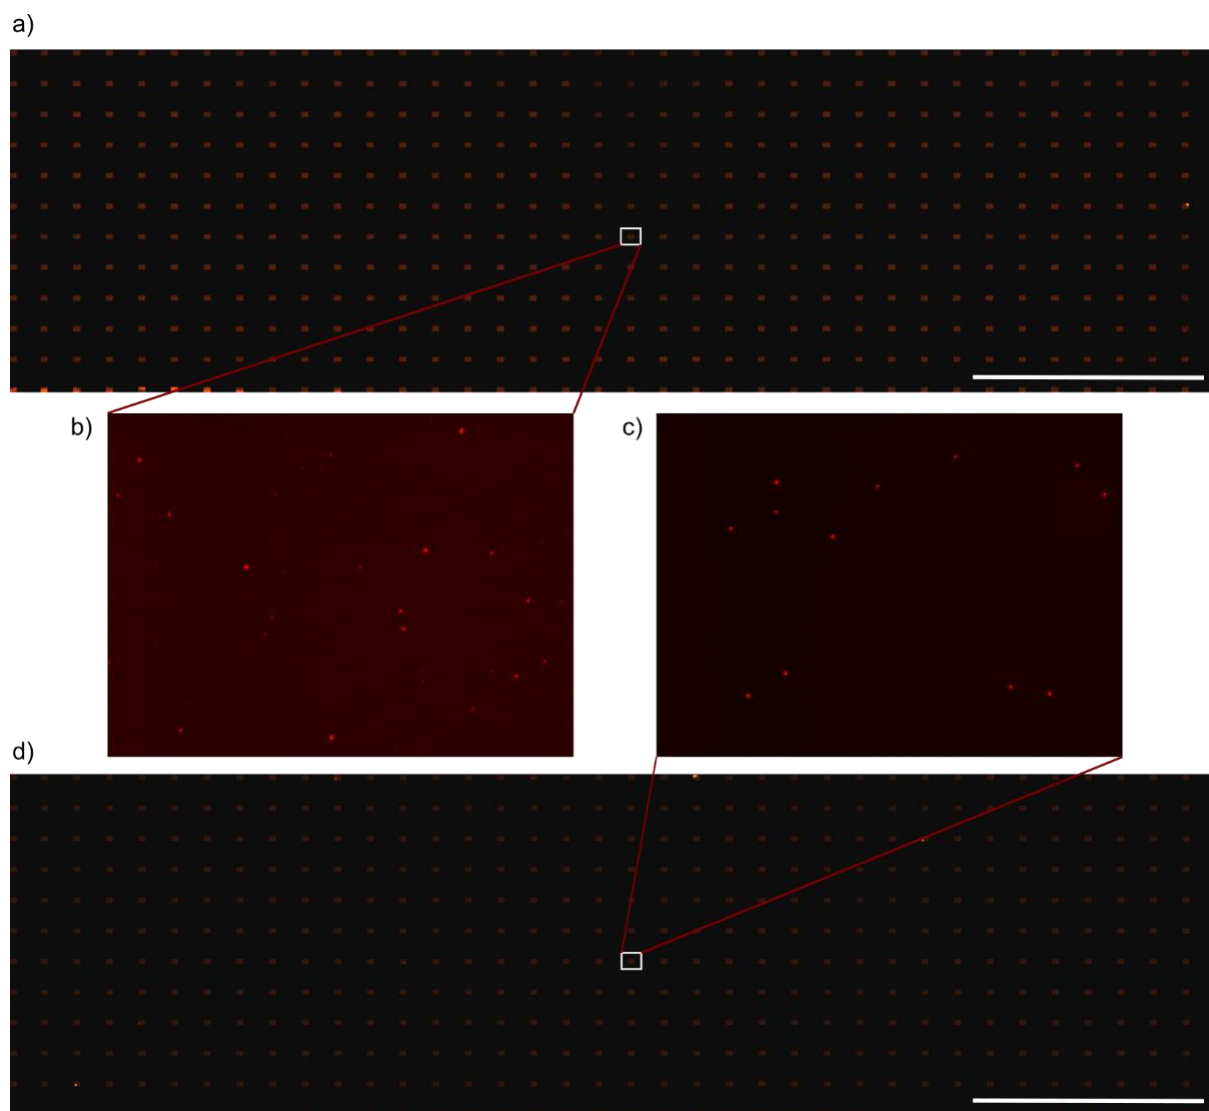

**Figure S3.** Fluorescence microscopy mapping and representative individual micrographs. a) and d) mapping of QD-decorated DNA origami lattice sample and DNA-free control sample, respectively. Scale bars: 1 cm. b) and c) representative individual images from the selected positions. Image sizes:  $394 \times 291 \mu\text{m}^2$ . Brightness and contrast of the map and individual images were adjusted with the same values to facilitate the visual comparison. DNA origami-bound QDs are responsible for the background intensity seen in the zoomed images (b,c), while the bright spots represent QD aggregates that are observed with and without DNA origami lattice. Integration was performed over the complete image and thus includes both dispersed and aggregated QDs.

## All recorded AFM images and their corresponding $\rho_6$ and $\mu_2$ values

The raw AFM image files can be found under: <https://osf.io/7fvrd/>

| Image                                                                                | $\rho_6$ | $\mu_2$ |
|--------------------------------------------------------------------------------------|----------|---------|
| 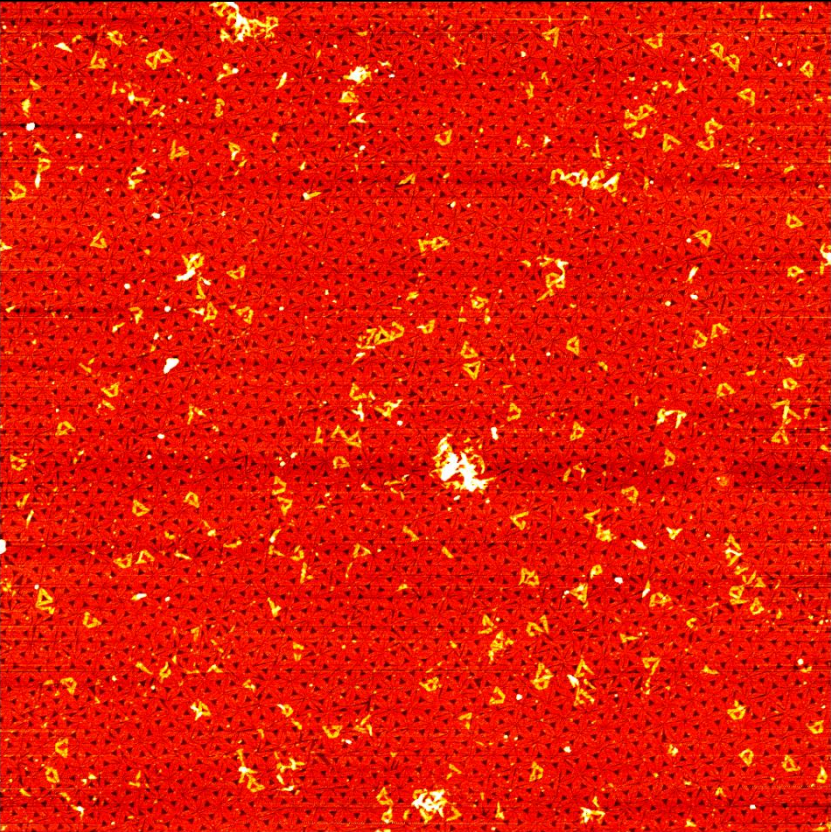  | 0.40     | 1.11    |
|  | 0.40     | 1.10    |



| Image                                                                                | $\rho_6$ | $\mu_2$ |
|--------------------------------------------------------------------------------------|----------|---------|
| 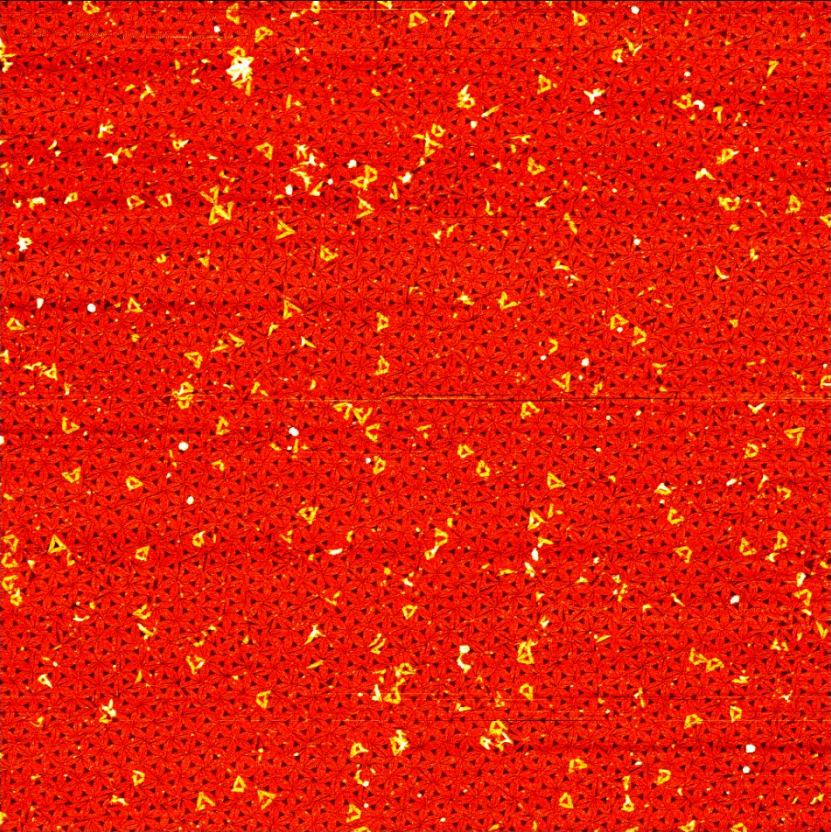  | 0.40     | 1.08    |
|  | 0.38     | 1.10    |



| Image                                                                                | $\rho_6$ | $\mu_2$ |
|--------------------------------------------------------------------------------------|----------|---------|
| 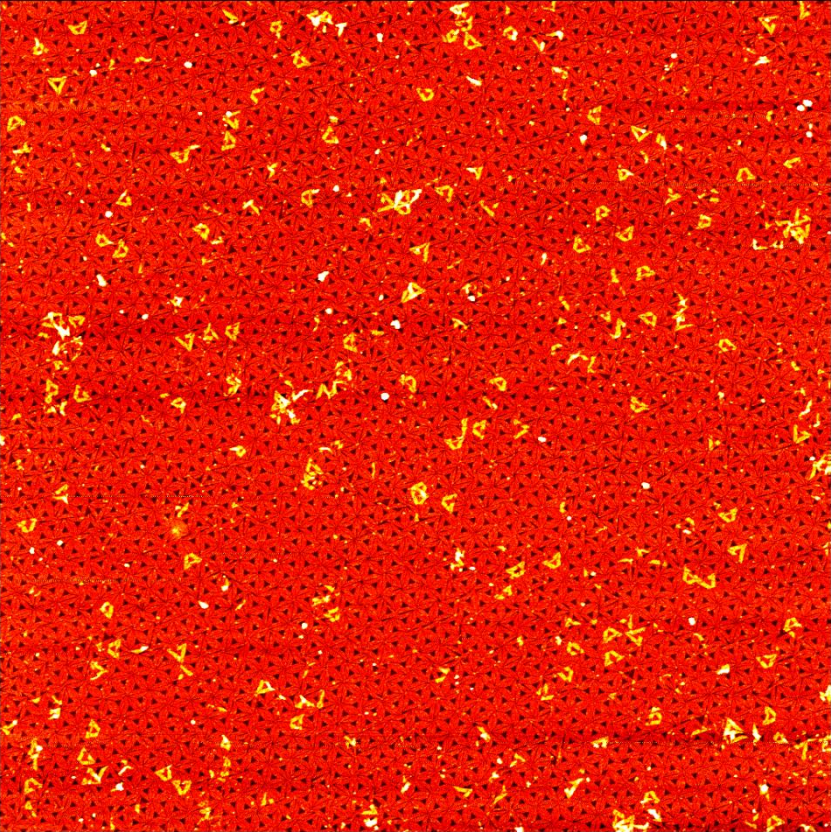  | 0.39     | 1.09    |
|  | 0.37     | 1.18    |



| Image                                                                                | $\rho_6$ | $\mu_2$ |
|--------------------------------------------------------------------------------------|----------|---------|
| 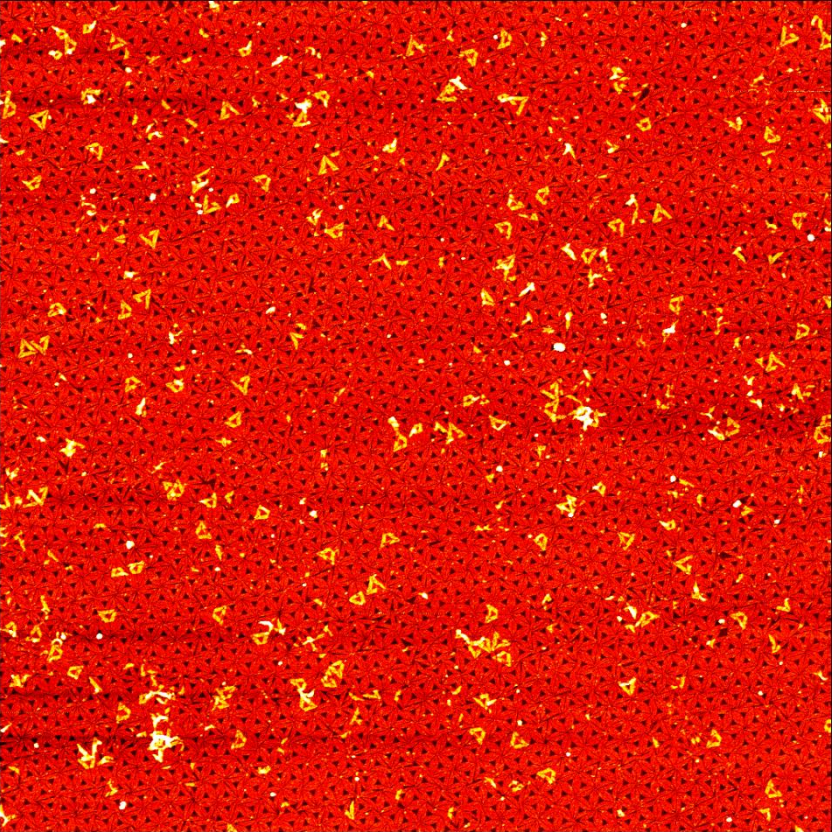  | 0.37     | 1.17    |
|  | 0.39     | 1.14    |



| Image                                                                                | $\rho_6$ | $\mu_2$ |
|--------------------------------------------------------------------------------------|----------|---------|
| 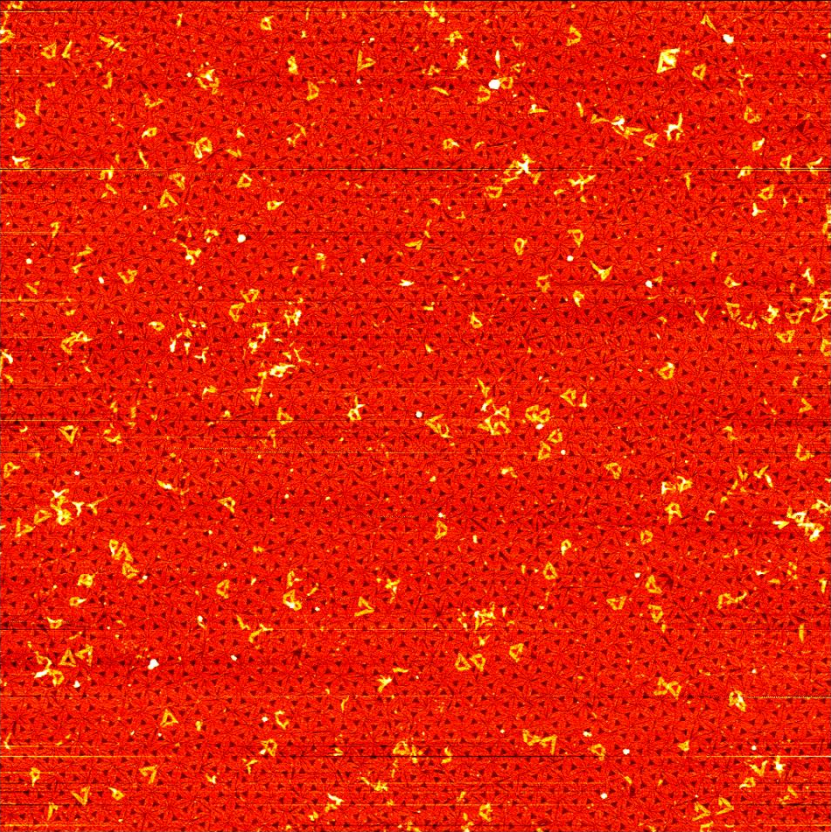  | 0.37     | 1.34    |
|  | 0.40     | 1.10    |



| Image                                                                                | $\rho_6$ | $\mu_2$ |
|--------------------------------------------------------------------------------------|----------|---------|
| 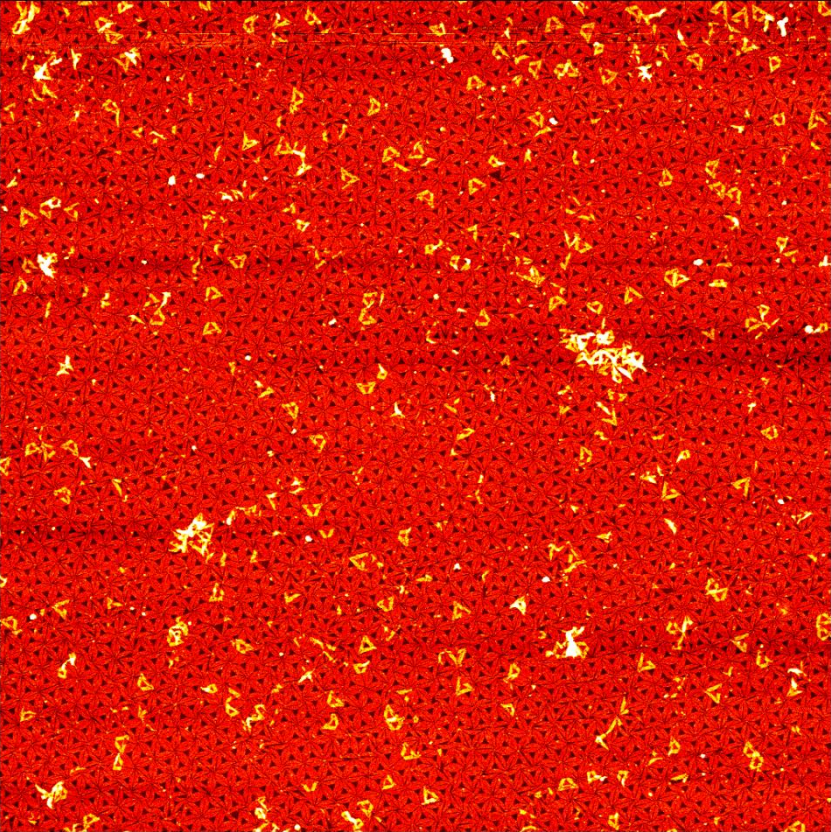  | 0.36     | 1.15    |
|  | 0.37     | 1.24    |



| Image                                                                                | $\rho_6$ | $\mu_2$ |
|--------------------------------------------------------------------------------------|----------|---------|
| 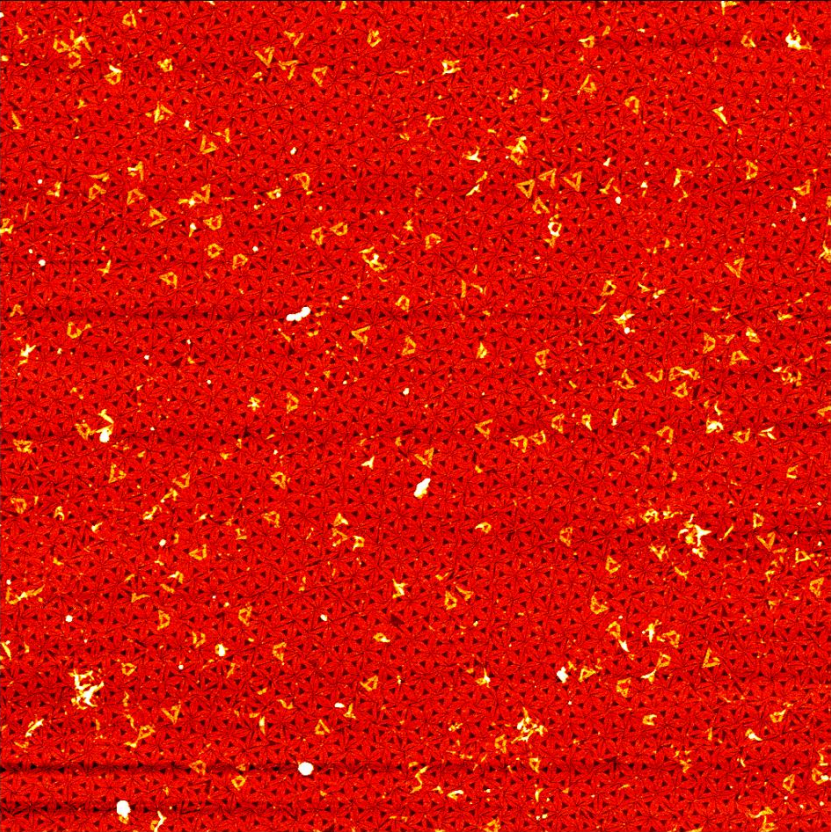  | 0.40     | 1.11    |
|  | 0.39     | 1.09    |



| Image                                                                                | $\rho_6$ | $\mu_2$ |
|--------------------------------------------------------------------------------------|----------|---------|
| 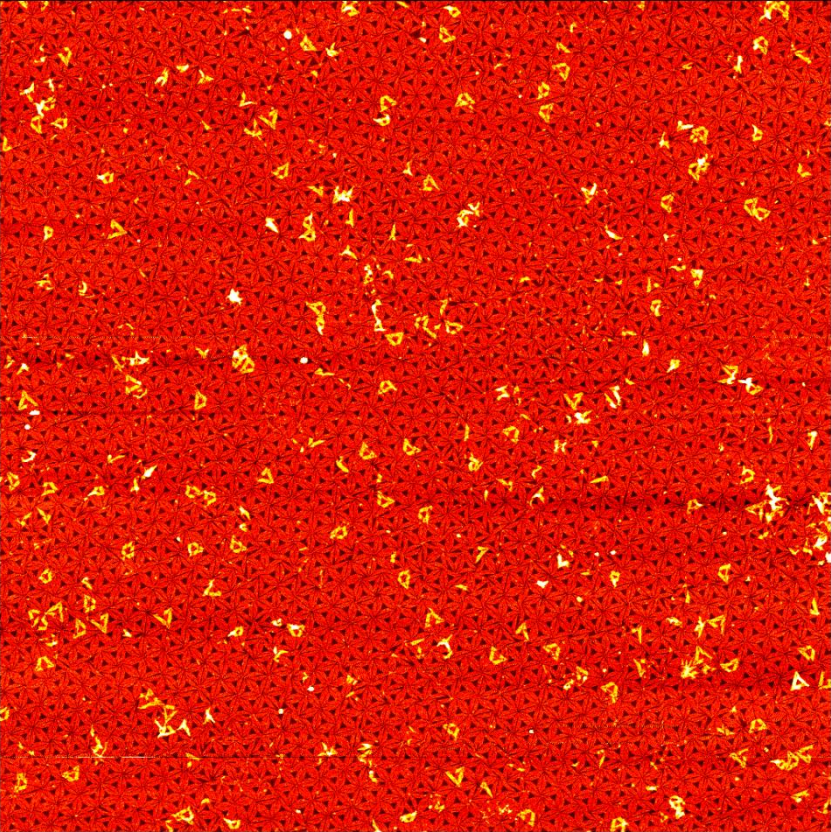  | 0.40     | 1.14    |
|  | 0.39     | 1.18    |



| Image                                                                                | $\rho_6$ | $\mu_2$ |
|--------------------------------------------------------------------------------------|----------|---------|
| 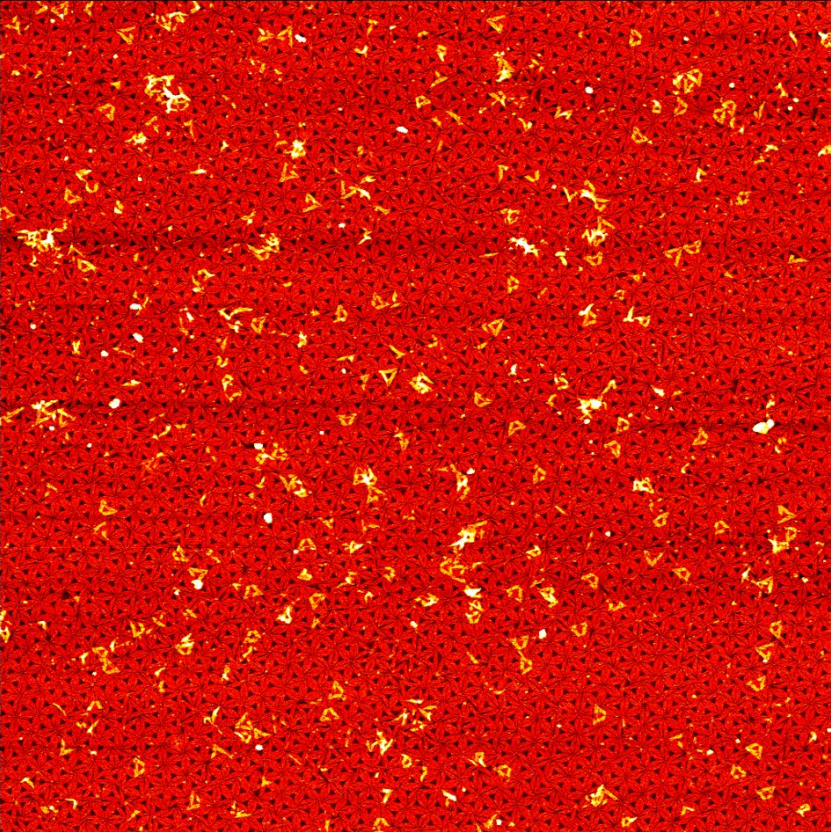  | 0.40     | 1.07    |
|  | 0.38     | 1.15    |



| Image                                                                                | $\rho_6$ | $\mu_2$ |
|--------------------------------------------------------------------------------------|----------|---------|
| 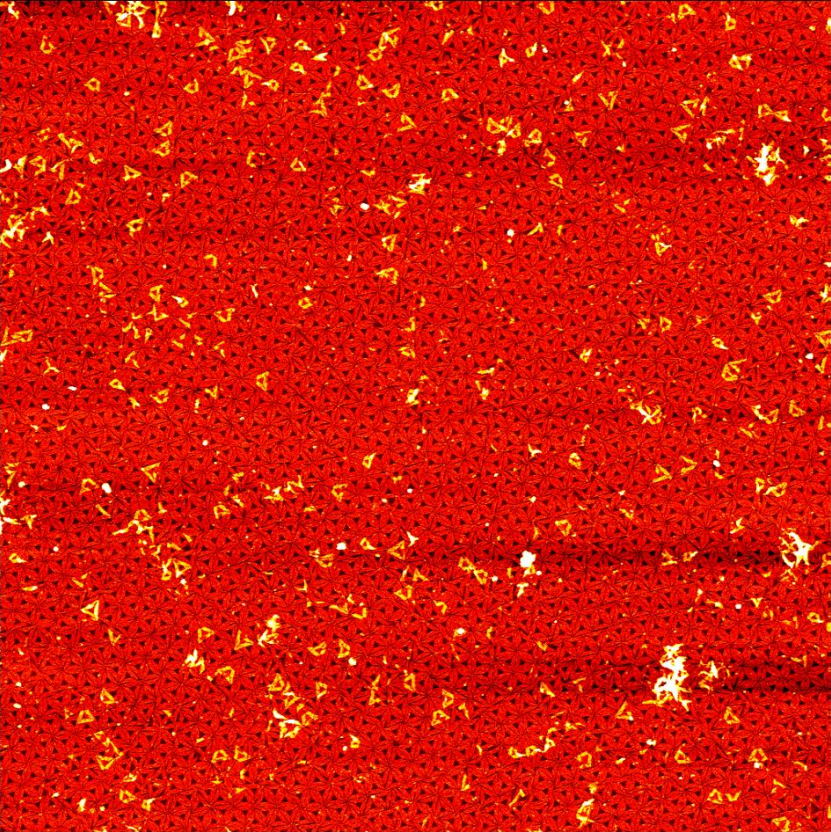  | 0.37     | 1.15    |
|  | 0.40     | 1.07    |



| Image                                                                                | $\rho_6$ | $\mu_2$ |
|--------------------------------------------------------------------------------------|----------|---------|
| 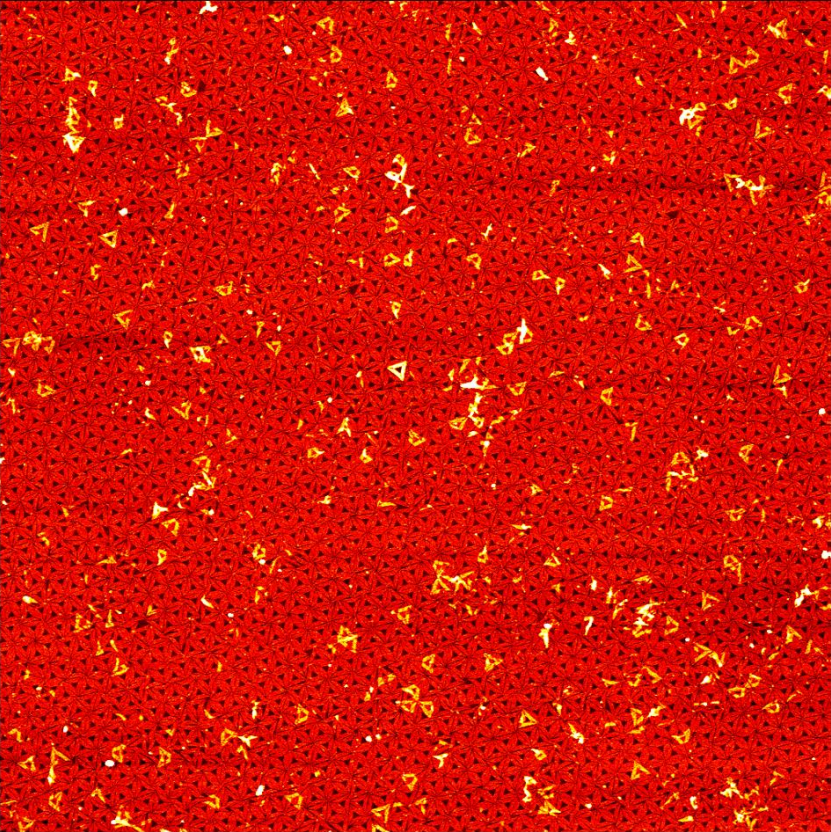  | 0.40     | 1.07    |
|  | 0.38     | 1.15    |



| Image                                                                                | $\rho_6$ | $\mu_2$ |
|--------------------------------------------------------------------------------------|----------|---------|
| 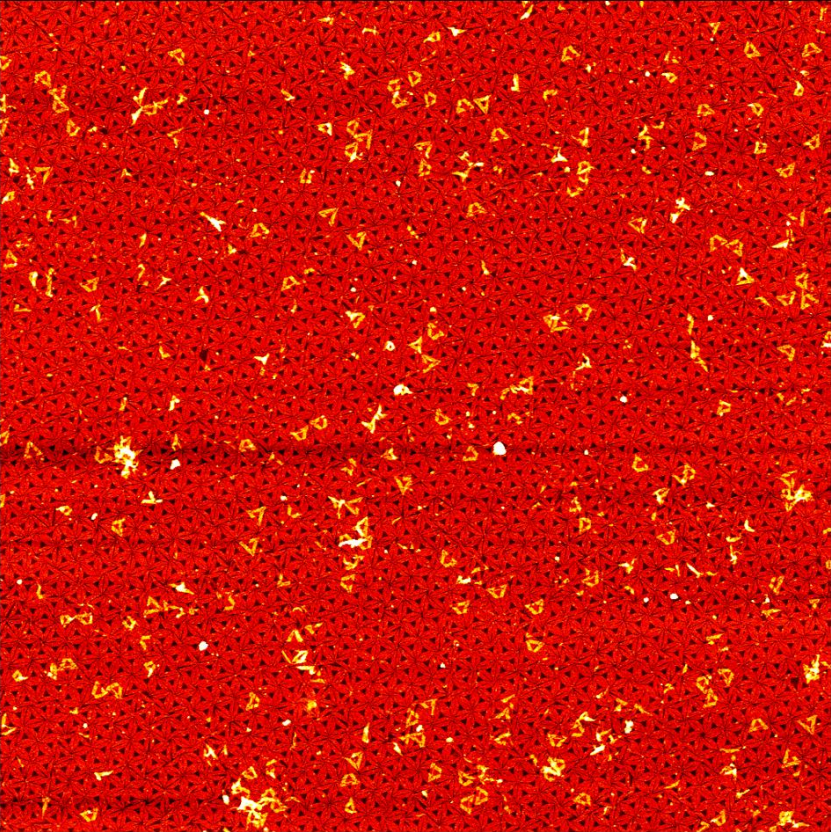  | 0.40     | 1.12    |
|  | 0.41     | 1.08    |



| Image                                                                                | $\rho_6$ | $\mu_2$ |
|--------------------------------------------------------------------------------------|----------|---------|
| 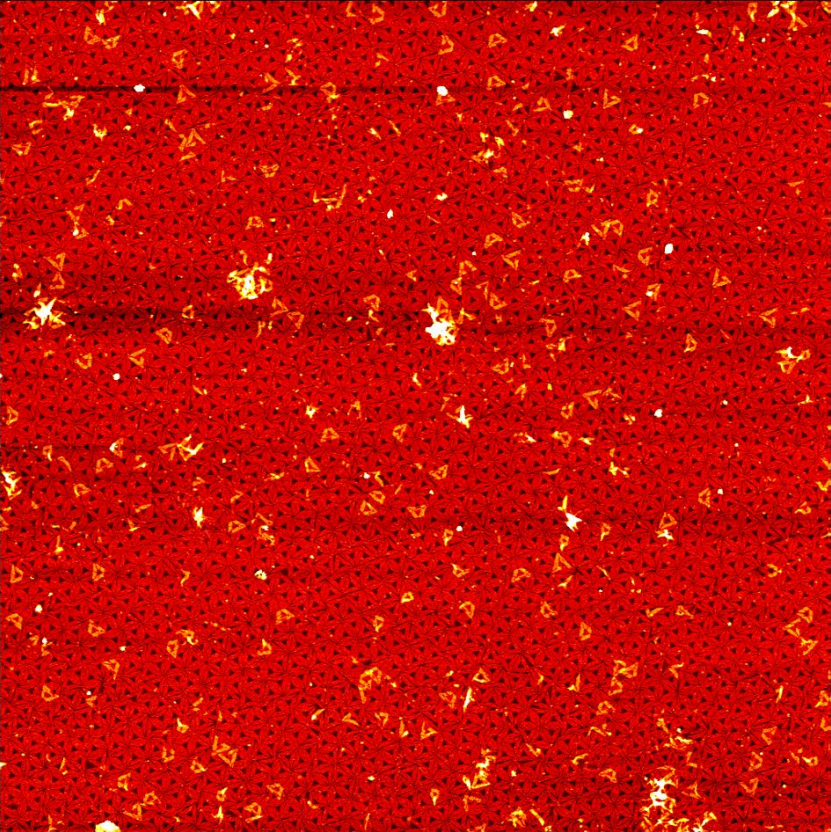  | 0.39     | 1.11    |
|  | 0.39     | 1.20    |



| Image                                                                                | $\rho_6$ | $\mu_2$ |
|--------------------------------------------------------------------------------------|----------|---------|
| 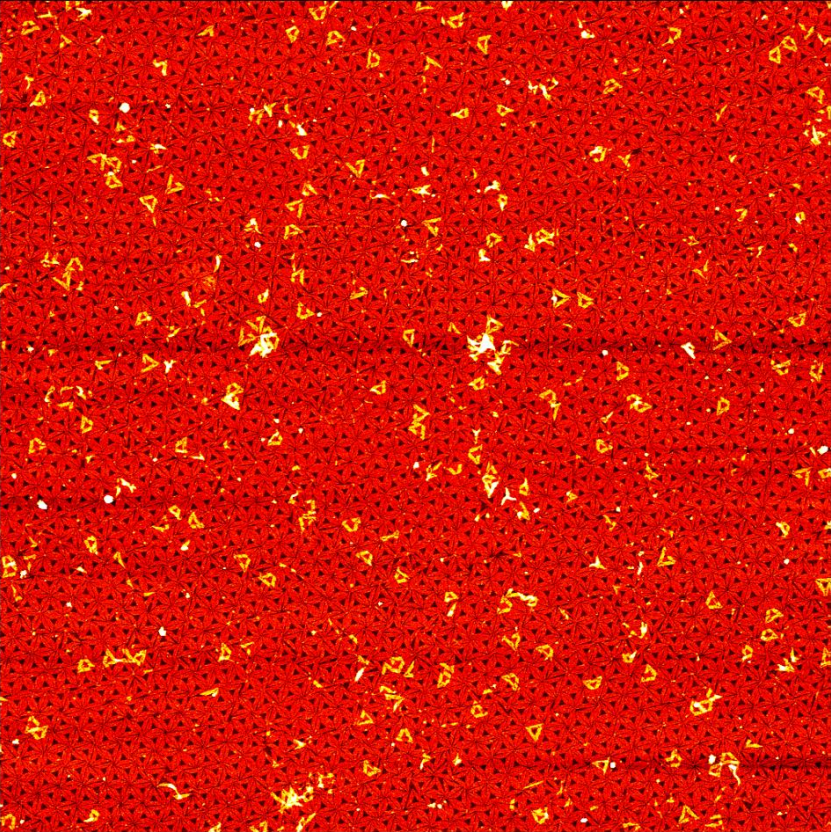  | 0.39     | 1.08    |
|  | 0.41     | 1.11    |



| Image                                                                                | $\rho_6$ | $\mu_2$ |
|--------------------------------------------------------------------------------------|----------|---------|
| 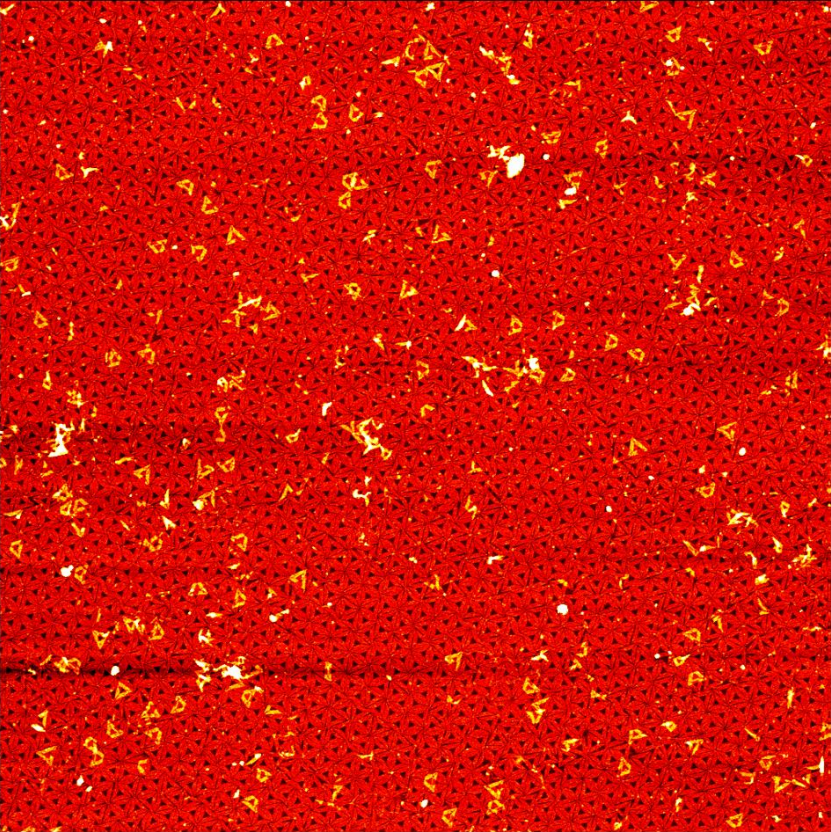  | 0.37     | 1.12    |
|  | 0.39     | 1.13    |



| Image                                                                                | $\rho_6$ | $\mu_2$ |
|--------------------------------------------------------------------------------------|----------|---------|
| 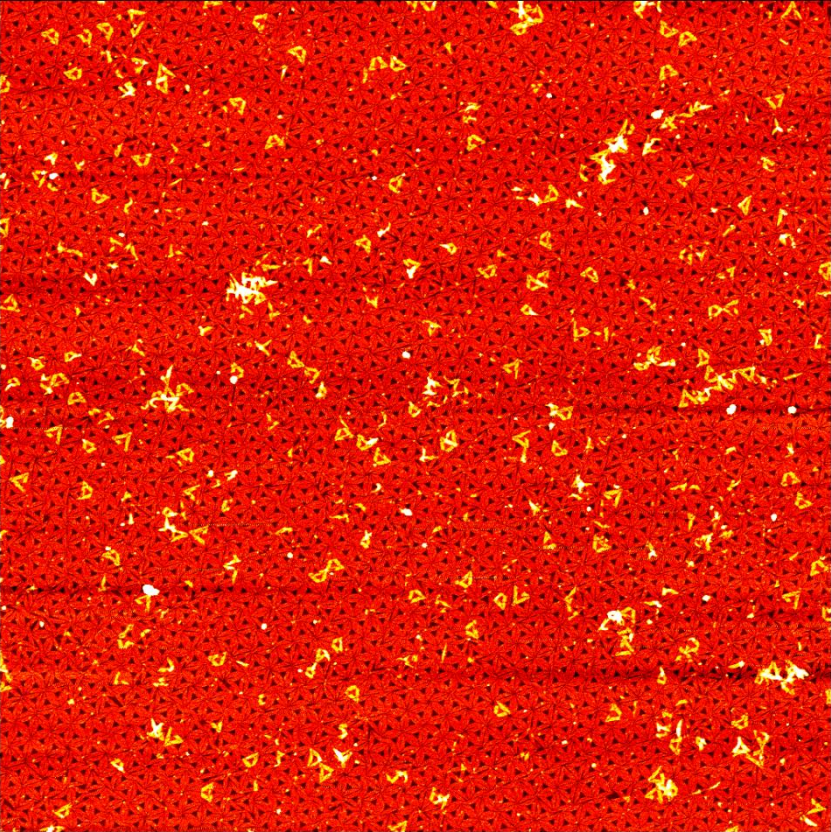  | 0.40     | 1.10    |
|  | 0.39     | 1.12    |



| Image                                                                                | $\rho_6$ | $\mu_2$ |
|--------------------------------------------------------------------------------------|----------|---------|
| 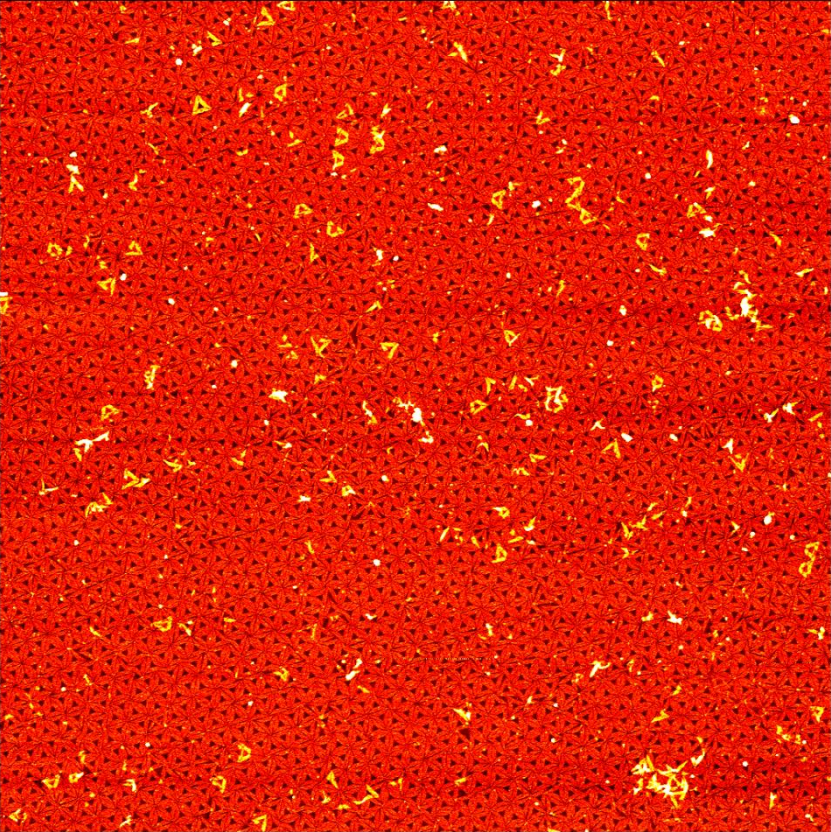  | 0.40     | 1.04    |
|  | 0.39     | 1.09    |



| Image                                                                                | $\rho_6$ | $\mu_2$ |
|--------------------------------------------------------------------------------------|----------|---------|
| 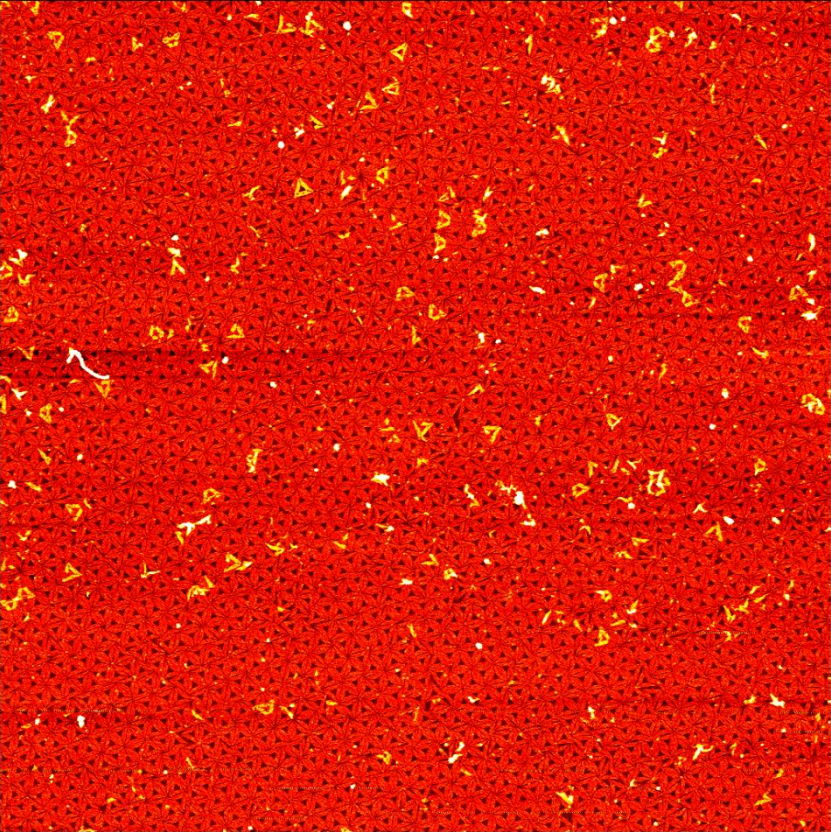  | 0.40     | 1.05    |
|  | 0.40     | 1.08    |



| Image                                                                                | $\rho_6$ | $\mu_2$ |
|--------------------------------------------------------------------------------------|----------|---------|
| 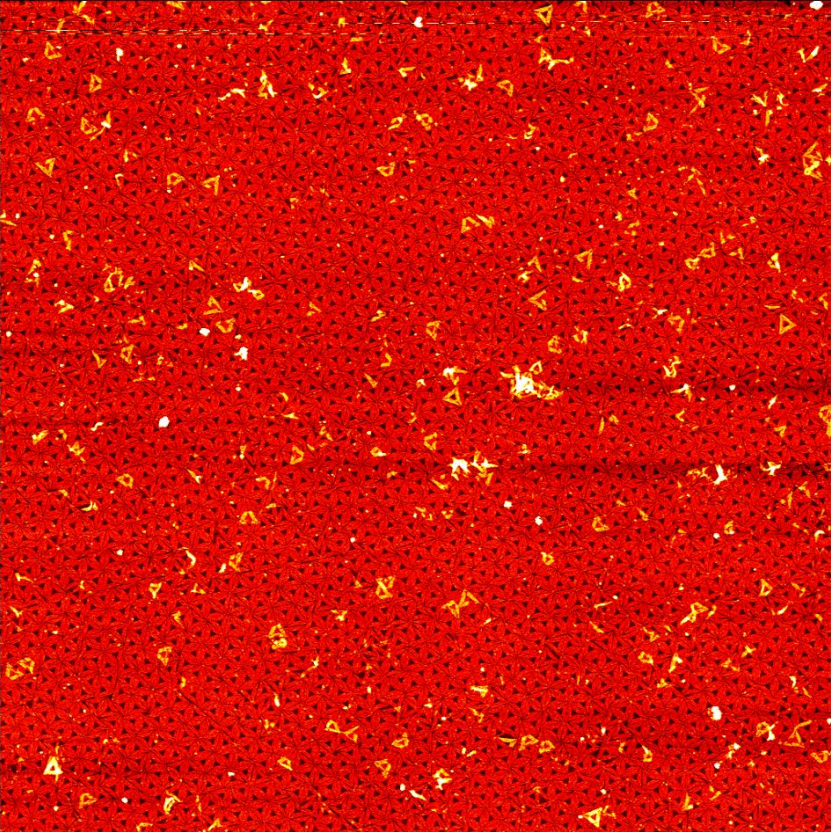  | 0.39     | 1.10    |
|  | 0.39     | 1.15    |



| Image                                                                                | $\rho_6$ | $\mu_2$ |
|--------------------------------------------------------------------------------------|----------|---------|
| 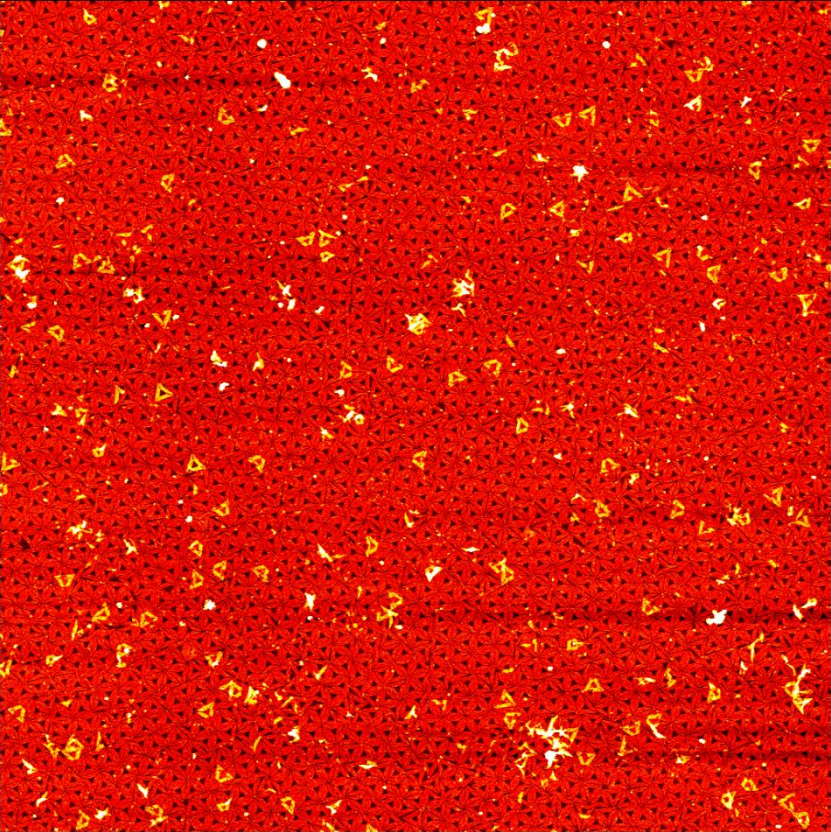  | 0.40     | 1.16    |
|  | 0.39     | 1.09    |



| Image                                                                                | $\rho_6$ | $\mu_2$ |
|--------------------------------------------------------------------------------------|----------|---------|
| 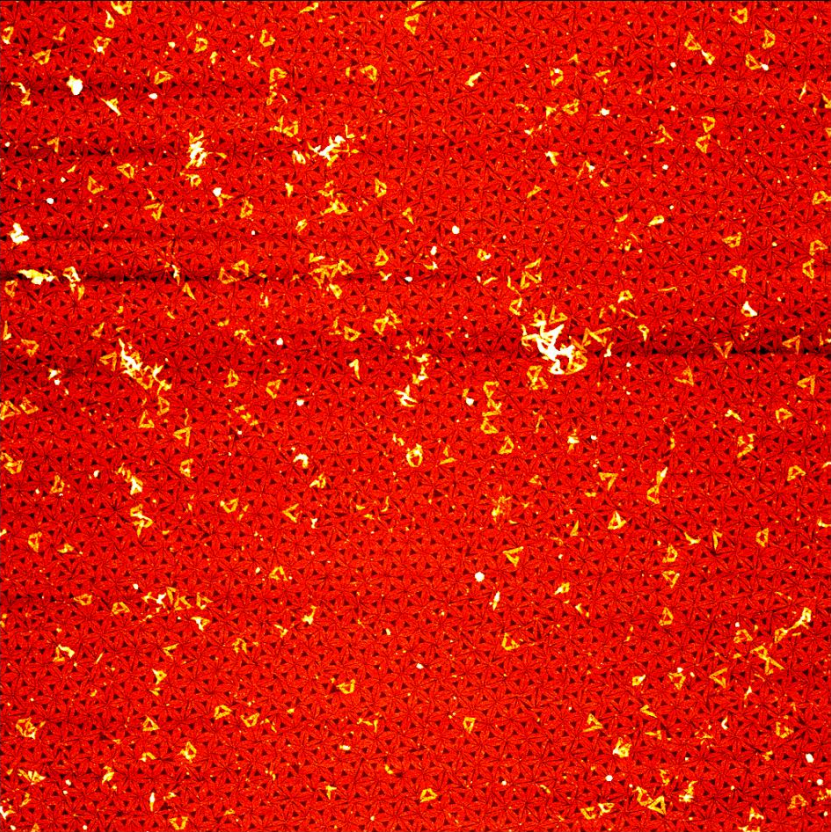  | 0.38     | 1.20    |
|  | 0.39     | 1.12    |



| Image                                                                                | $\rho_6$ | $\mu_2$ |
|--------------------------------------------------------------------------------------|----------|---------|
| 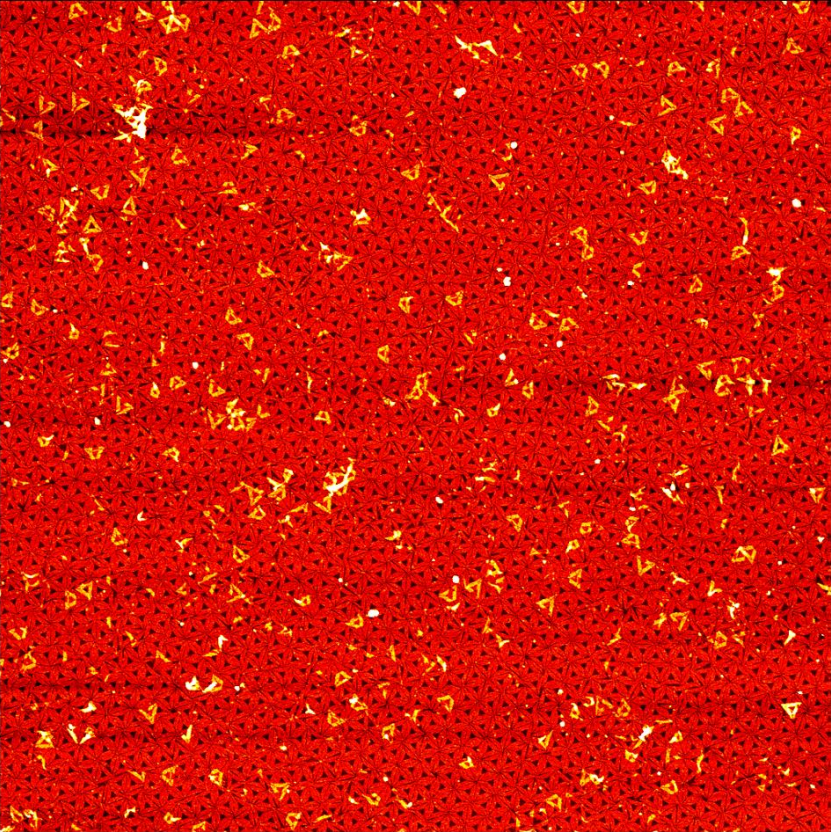  | 0.38     | 1.13    |
|  | 0.38     | 1.19    |



| Image                                                                                | $\rho_6$ | $\mu_2$ |
|--------------------------------------------------------------------------------------|----------|---------|
| 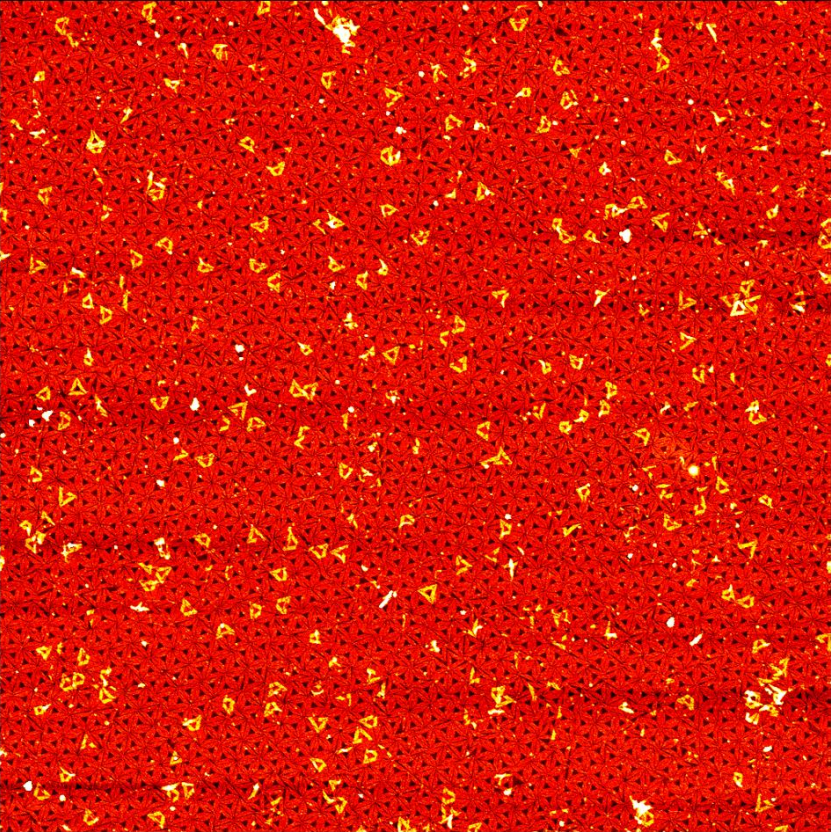  | 0.40     | 1.06    |
|  | 0.38     | 1.14    |



| Image                                                                                | $\rho_6$ | $\mu_2$ |
|--------------------------------------------------------------------------------------|----------|---------|
| 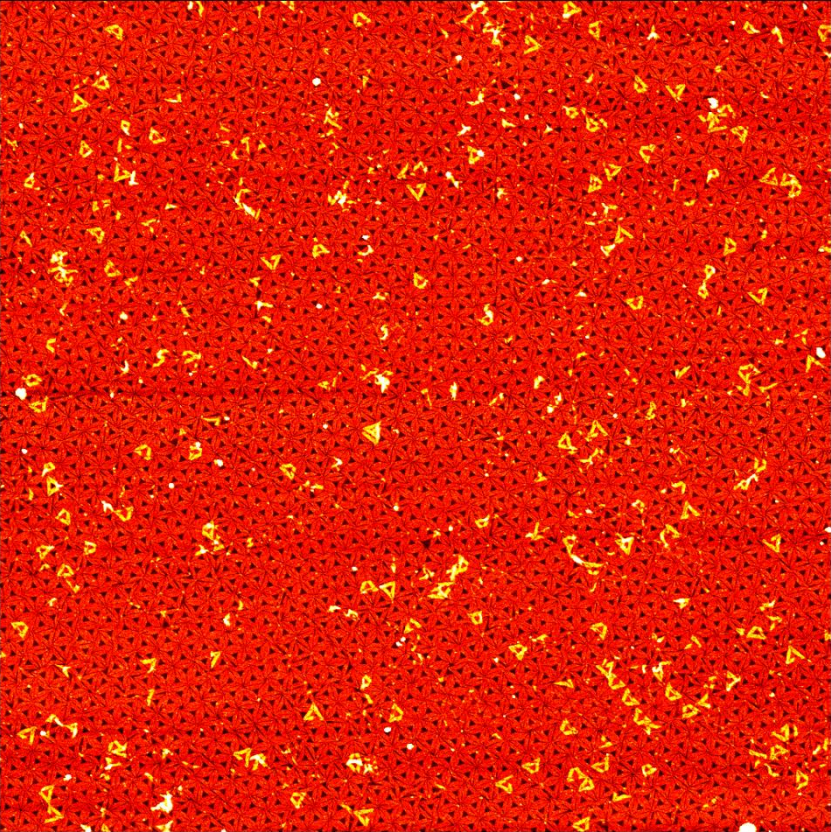  | 0.39     | 1.12    |
|  | 0.40     | 1.08    |



| Image                                                                                | $\rho_6$ | $\mu_2$ |
|--------------------------------------------------------------------------------------|----------|---------|
| 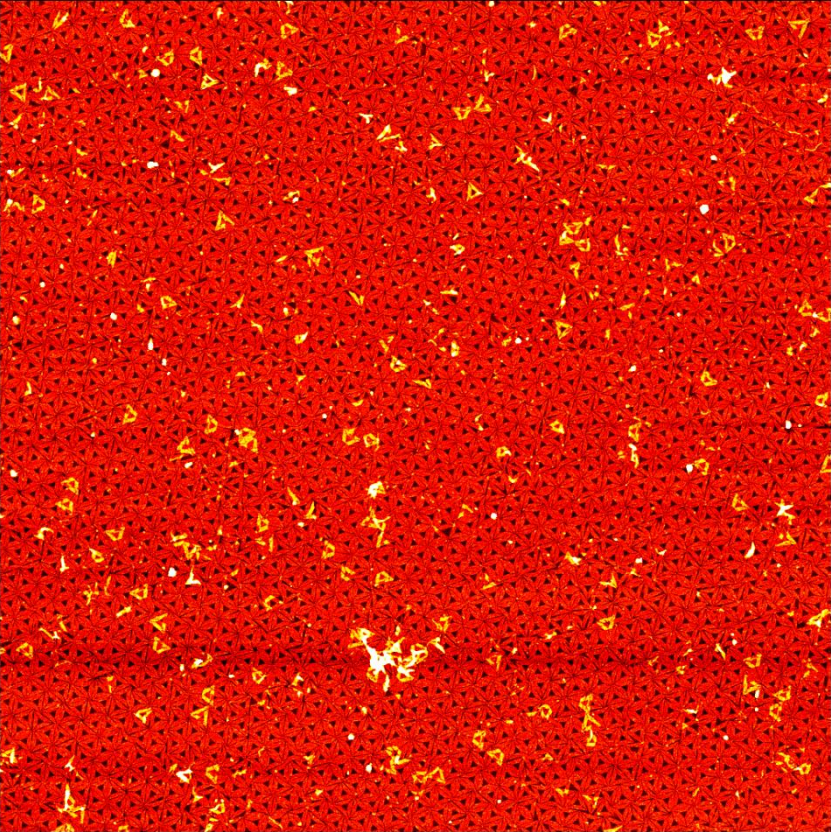  | 0.39     | 1.09    |
|  | 0.38     | 1.12    |



| Image                                                                                | $\rho_6$ | $\mu_2$ |
|--------------------------------------------------------------------------------------|----------|---------|
| 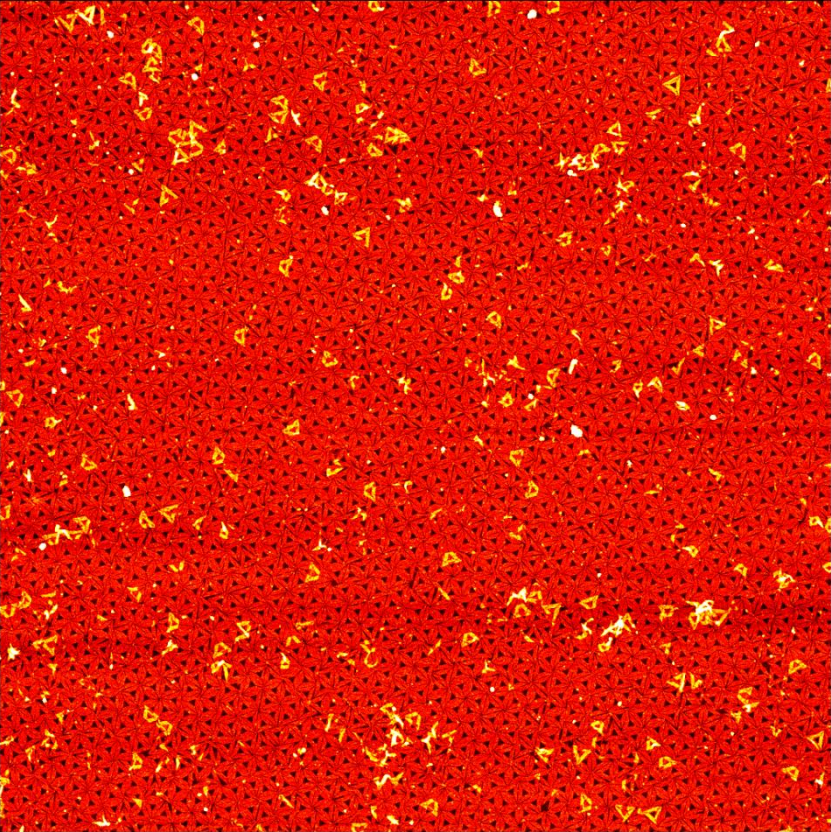  | 0.39     | 1.08    |
|  | 0.39     | 1.11    |



| Image                                                                               | $\rho_6$ | $\mu_2$ |
|-------------------------------------------------------------------------------------|----------|---------|
| 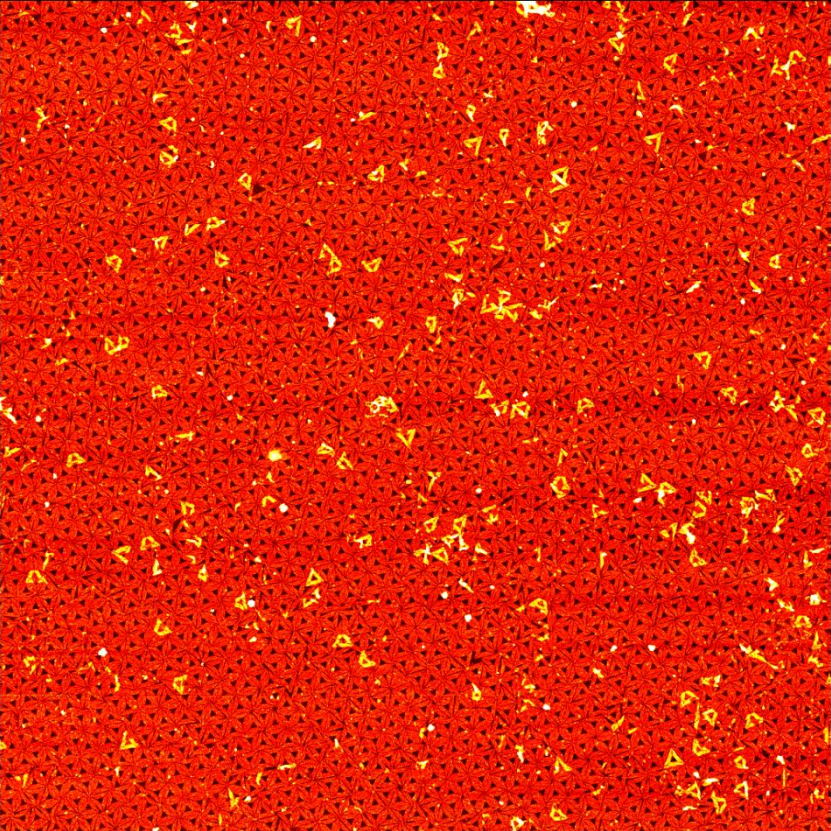 | 0.39     | 1.11    |

## Author Contributions

Yang Xin

Conceptualization: Supporting, Data curation: Equal, Formal analysis: Equal, Investigation: Equal, Methodology: Equal, Validation: Equal, Visualization: Equal, Writing – original draft: Supporting, Writing – review & editing: Equal

Boxuan Shen

Conceptualization: Supporting, Data curation: Equal, Formal analysis: Equal, Investigation: Equal, Validation: Equal, Visualization: Equal, Writing – original draft: Supporting, Writing – review & editing: Equal

Mauri A. Kostainen

Supervision: Supporting, Writing – review & editing: Equal

Guido Grundmeier

Supervision: Supporting, Writing – review & editing: Equal

Mario Castro

Data curation: Equal, Formal analysis: Lead, Methodology: Equal, Validation: Equal, Visualization: Equal, Writing – review & editing: Equal

Veikko Linko

Conceptualization: Lead, Methodology: Equal, Supervision: Supporting, Writing – original draft: Supporting, Writing – review & editing: Equal

Adrian Keller

Conceptualization: Lead, Data curation: Equal, Formal analysis: Equal, Methodology: Equal, Validation: Equal, Visualization: Equal, Supervision: Lead, Writing – original draft: Lead, Writing – review & editing: Equal
